# Supplementary material
Source: Frontiers journal article supplement (https://www.frontiersin.org/articles/410794)
Supplement: Data_Sheet_1.pdf [file Data_Sheet_1.pdf]

## **Electronic Supporting Information**

### **A Chiral Bipyrimidine-Bridged Dy<sub>2</sub> SMM: A Comparative Experimental and Theoretical study of the Relaxation Mechanism**

Ismael F. Díaz-Ortega,<sup>†</sup> Juan Manuel Herrera,<sup>\*,†</sup> José Ramón Galán-Mascarós,<sup>⊥</sup> Álvaro Reyes Carmona,<sup>⊥</sup> Sourav Dey,<sup>#</sup> Gopalan Rajaraman,<sup>\*,#</sup> H. Nojiri,<sup>\*,‡</sup> Enrique Colacio<sup>\*,†</sup>

<sup>†</sup>*Departamento de Química Inorgánica, Facultad de Ciencias, Universidad de Granada, Avda. Fuentenueva s/n, 18071, Granada, Spain. ecolacio@ugr.es, [jmherrera@ugr.es](mailto:jmherrera@ugr.es)*

<sup>⊥</sup>*Catalan Institution for Research and Advanced Studies, Passeig Lluís Companys 23, Barcelona 08010, Spain*

<sup>#</sup>*Department of Chemistry, Indian Institute of Technology Bombay, Powai, Mumbai 400076, India. rajaraman@chem.iitb.ac.in*

<sup>‡</sup>*Institute for Materials Research, Tohoku University, Katahira, Sendai, 980-8577, Japan. [nojiri@imr.tohoku.ac.jp](mailto:nojiri@imr.tohoku.ac.jp)*

**Table S1. Crystallographic data for complexes d-1 and l-1.**

|                                             | <b>d-1</b>                                                                                     | <b>l-1</b>                                                                                     |
|---------------------------------------------|------------------------------------------------------------------------------------------------|------------------------------------------------------------------------------------------------|
| Formula                                     | C <sub>80</sub> H <sub>90</sub> Dy <sub>2</sub> F <sub>18</sub> N <sub>4</sub> O <sub>12</sub> | C <sub>80</sub> H <sub>90</sub> Dy <sub>2</sub> F <sub>18</sub> N <sub>4</sub> O <sub>12</sub> |
| Mw (g·mol <sup>-1</sup> )                   | 1966.55                                                                                        | 1966.55                                                                                        |
| Crystal System                              | triclinic                                                                                      | triclinic                                                                                      |
| Space group                                 | P1                                                                                             | P1                                                                                             |
| a (Å)                                       | 10.0697(7)                                                                                     | 10.0837(6)                                                                                     |
| b (Å)                                       | 13.0130(10)                                                                                    | 13.0136(7)                                                                                     |
| c (Å)                                       | 17.3895(13)                                                                                    | 17.3873(9)                                                                                     |
| α (°)                                       | 101.678(2)                                                                                     | 101.758(2)                                                                                     |
| β (°)                                       | 103.197(3)                                                                                     | 103.256(2)                                                                                     |
| γ (°)                                       | 106.674(2)                                                                                     | 106.578(2)                                                                                     |
| Z                                           | 1                                                                                              | 1                                                                                              |
| D <sub>c</sub> (g·cm <sup>-3</sup> )        | 1.604                                                                                          | 1.602                                                                                          |
| M (MoKα) (mm <sup>-1</sup> )                | 1.924                                                                                          | 1.922                                                                                          |
| T (K)                                       | 100                                                                                            | 100                                                                                            |
| F(000)                                      | 988.0                                                                                          | 988.0                                                                                          |
| 2Θ range for data collection/°              | 4.434 to 56.696                                                                                | 5.016 to 49.836                                                                                |
| Reflec. collected / unique                  | 53025 / 18205                                                                                  | 32344 / 12708                                                                                  |
| Data/restraints/parameters                  | 18205/3/1063                                                                                   | 12708/51/1063                                                                                  |
| GOF on F <sup>2</sup>                       | 1.081                                                                                          | 1.044                                                                                          |
| R <sub>I</sub> <sup>a,b</sup>               | 0.0201(0.0181)                                                                                 | 0.0254 (0.0214)                                                                                |
| wR <sub>2</sub> <sup>c</sup>                | 0.0403 (0.0410)                                                                                | 0.0406 (0.0418)                                                                                |
| Largest diff. peak/hole / e Å <sup>-3</sup> | 0.81/-0.80                                                                                     | 0.34/-0.55                                                                                     |
| Flack parameter                             | 0.001(3)                                                                                       | -0.029(4)                                                                                      |

---

<sup>a</sup>  $R_1 = \Sigma ||F_o| - |F_c|| / \Sigma |F_o|$ . <sup>b</sup> Values in parentheses for reflections with  $I > 2\sigma(I)$ . <sup>c</sup>  $wR_2 = \{\Sigma [w(F_o^2 - F_c^2)^2] / \Sigma [w(F_o^2)^2]\}^{1/2}$

---

**Table S2.** Selected bond distances and angles for complex **d-1**

| Bond distances (Å) |          | Bond angles (°) |            |             |            |
|--------------------|----------|-----------------|------------|-------------|------------|
| Dy1-O1             | 2.298(4) | O1-Dy1-O2       | 75.14(13)  | O7-Dy2-O8   | 73.83(13)  |
| Dy1-O2             | 2.366(4) | O1-Dy1-O4       | 78.89(13)  | O7-Dy2-O10  | 128.09(13) |
| Dy1-O3             | 2.284(4) | O1-Dy1-O5       | 154.30(14) | O7-Dy2-O12  | 75.55(13)  |
| Dy1-O4             | 2.343(4) | O1-Dy1-N6       | 131.23(14) | O7-Dy2-N3   | 73.58(13)  |
| Dy1-O5             | 2.308(4) | O1-Dy1-N1       | 103.24(13) | O7-Dy2-N4   | 124.03(14) |
| Dy1-O6             | 2.376(4) | O1-Dy1-N2       | 71.75(14)  | O8-Dy2-N3   | 81.90(14)  |
| Dy1-N1             | 2.615(5) | O2-Dy1-O6       | 142.43(12) | O8-Dy2-N4   | 68.17(13)  |
| Dy1-N2             | 2.616(5) | O2-Dy1-N1       | 69.49(14)  | O9-Dy2-O7   | 85.91(13)  |
| Dy2-O7             | 2.322(4) | O2-Dy1-N2       | 110.50(13) | O9-Dy2-O8   | 115.56(13) |
| Dy2-O8             | 2.353(4) | O3-Dy1-O1       | 82.76(13)  | O9-Dy2-O10  | 75.61(13)  |
| Dy2-O9             | 2.270(3) | O3-Dy1-O2       | 81.32(13)  | O9-Dy2-O11  | 86.28(13)  |
| Dy2-O10            | 2.339(4) | O3-Dy1-O4       | 75.91(14)  | O9-Dy2-O12  | 77.42(13)  |
| Dy2-O11            | 2.301(4) | O3-Dy1-O5       | 85.67(13)  | O9-Dy2-N3   | 148.46(15) |
| Dy2-O12            | 2.345(4) | O3-Dy1-O6       | 122.87(13) | O9-Dy2-N4   | 147.57(14) |
| Dy2-N3             | 2.618(5) | O3-Dy1-N1       | 147.13(15) | O10-Dy2-O8  | 71.68(13)  |
| Dy2-N4             | 2.613(4) | O3-Dy1-N2       | 147.23(14) | O10-Dy2-O12 | 141.91(12) |
|                    |          | O4-Dy1-O2       | 147.27(13) | O10-Dy2-N3  | 135.93(14) |
|                    |          | O4-Dy1-O6       | 70.30(13)  | O10-Dy2-N4  | 75.57(13)  |
|                    |          | O4-Dy1-N1       | 136.87(14) | O11-Dy2-O7  | 151.18(13) |
|                    |          | O4-Dy1-N2       | 79.18(13)  | O11-Dy2-O8  | 134.07(13) |
|                    |          | O5-Dy1-O2       | 80.49(13)  | O11-Dy2-O10 | 76.21(13)  |
|                    |          | O5-Dy1-O4       | 120.26(13) | O11-Dy2-O12 | 75.68(13)  |
|                    |          | O5-Dy1-O6       | 74.04(13)  | O11-Dy2-N3  | 100.15(13) |

|           |            |            |            |
|-----------|------------|------------|------------|
| O5-Dy1-N1 | 75.15(13)  | O11-Dy2-N4 | 72.66(13)  |
| O5-Dy1-N1 | 125.66(13) | O12-Dy2-O8 | 145.47(13) |
| O6-Dy1-N1 | 77.48(14)  | O12-Dy2-N3 | 74.45(14)  |
| O6-Dy1-N2 | 66.10(13)  | O12-Dy2-N4 | 118.91(13) |
| N1-Dy1-N2 | 61.63(14)  | N3-Dy2-N4  | 61.88(14)  |

---

**Table S3.** Selected bond distances and angles for complex **I-1**

| Bond distances (Å) |          | Bond angles (°) |          |             |          |
|--------------------|----------|-----------------|----------|-------------|----------|
| Dy1-O1             | 2.294(6) | O1-Dy1-O2       | 75.3(2)  | O7-Dy2-O8   | 74.1(2)  |
| Dy1-O2             | 2.378(6) | O1-Dy1-O4       | 78.8(2)  | O7-Dy2-O10  | 128.2(2) |
| Dy1-O3             | 2.281(6) | O1-Dy1-O5       | 154.6(2) | O7-Dy2-O12  | 75.6(2)  |
| Dy1-O4             | 2.354(6) | O1-Dy1-O6       | 131.2(2) | O7-Dy2-N3   | 73.8(2)  |
| Dy1-O5             | 2.303(6) | O1-Dy1-N1       | 103.7(2) | O7-Dy2-N4   | 123.9(2) |
| Dy1-O6             | 2.376(6) | O1-Dy1-N2       | 71.6(2)  | O8-Dy2-N3   | 82.2(2)  |
| Dy1-N1             | 2.607(8) | O2-Dy1-N1       | 69.5(2)  | O8-Dy2-N4   | 68.0(2)  |
| Dy1-N2             | 2.617(8) | O2-Dy1-N2       | 110.5(2) | O9-Dy2-O7   | 85.6(2)  |
| Dy2-O7             | 2.328(6) | O3-Dy1-O1       | 82.6(2)  | O9-Dy2-O8   | 115.6(2) |
| Dy2-O8             | 2.354(6) | O3-Dy1-O2       | 81.4(2)  | O9-Dy2-O10  | 75.6(2)  |
| Dy2-O9             | 2.270(6) | O3-Dy1-O4       | 76.0(2)  | O9-Dy2-O11  | 86.7(2)  |
| Dy2-O10            | 2.336(6) | O3-Dy1-O5       | 85.8(2)  | O9-Dy2-O12  | 77.3(2)  |
| Dy2-O11            | 2.301(6) | O3-Dy1-O6       | 122.9(2) | O9-Dy2-N3   | 148.3(2) |
| Dy2-O12            | 2.344(6) | O3-Dy1-N1       | 147.1(2) | O9-Dy2-N4   | 148.0(2) |
| Dy2-N3             | 2.294(6) | O3-Dy1-N2       | 147.0(2) | O10-Dy2-O8  | 71.7(2)  |
| Dy2-N4             | 2.378(6) | O4-Dy1-O2       | 147.5(2) | O10-Dy2-O12 | 141.7(2) |
|                    |          | O4-Dy1-O6       | 70.2(2)  | O10-Dy2-N3  | 136.1(2) |
|                    |          | O4-Dy1-N1       | 136.8(2) | O10-Dy2-N4  | 75.9(2)  |
|                    |          | O4-Dy1-N2       | 79.0(2)  | O11-Dy2-O7  | 150.8(2) |
|                    |          | O5-Dy1-O2       | 80.6(2)  | O11-Dy2-O8  | 134.1(2) |
|                    |          | O5-Dy1-O4       | 120.1(2) | O11-Dy2-O10 | 76.5(2)  |
|                    |          | O5-Dy1-O6       | 73.9(2)  | O11-Dy2-O12 | 75.3(2)  |
|                    |          | O5-Dy1-N1       | 74.9(2)  | O11-Dy2-N3  | 99.5(2)  |

|           |          |            |          |
|-----------|----------|------------|----------|
| O5-Dy1-N2 | 125.8(2) | O11-Dy2-N4 | 72.8(2)  |
| O6-Dy1-O2 | 142.3(2) | O12-Dy2-O8 | 145.7(2) |
| O6-Dy1-N1 | 77.3(2)  | O12-Dy2-N3 | 74.3(2)  |
| O6-Dy1-N2 | 66.2(2)  | O12-Dy2-N4 | 118.8(2) |
| N1-Dy1-N2 | 62.0(2)  | N4-Dy2-N3  | 61.6(2)  |

---

**Table S4.** Continuous Shape Measures<sup>i</sup> of the coordination sphere geometry for the Dy(III) centres in the complexes described in this work.

| Compound |        | ETBPY                                  | TT    | JSD   | BTPR  | JBTPR | JETBPY | JGBF   | TDD   | SAPR                    | CU    | HBPY   | HPY    | OP     |
|----------|--------|----------------------------------------|-------|-------|-------|-------|--------|--------|-------|-------------------------|-------|--------|--------|--------|
| d-1      | Dy1    | 23.333                                 | 9.614 | 5.317 | 2.020 | 2.593 | 27.454 | 14.668 | 2.315 | 0.686                   | 8.865 | 14.104 | 21.879 | 29.514 |
|          | Dy2    | 22.650                                 | 9.850 | 3.736 | 1.711 | 2.246 | 27.264 | 15.062 | 1.085 | 1.083                   | 9.074 | 14.796 | 23.414 | 28.776 |
| I-1      | Dy1    | 23.466                                 | 9.581 | 5.304 | 2.059 | 2.583 | 27.623 | 14.749 | 2.357 | 0.666                   | 8.860 | 14.187 | 21.953 | 29.512 |
|          | Dy2    | 22.659                                 | 9.784 | 3.744 | 1.697 | 2.269 | 27.313 | 15.041 | 1.063 | 1.136                   | 9.006 | 14.632 | 23.212 | 28.982 |
| ETBPY-8  | 13 D3h | Elongated trigonal bipyramid           |       |       |       |       |        | TDD-8  | 6 D2d | Triangular dodecahedron |       |        |        |        |
| TT-8     | 12 Td  | Triakis tetrahedron                    |       |       |       |       |        | SAPR-8 | 5 D4d | Square antiprism        |       |        |        |        |
| JSD-8    | 11 D2d | Snub diphenoid J84                     |       |       |       |       |        | CU-8   | 4 Oh  | Cube                    |       |        |        |        |
| BTPR-8   | 10 C2v | Biaugmented trigonal prism             |       |       |       |       |        | HBPY-8 | 3 D6h | Hexagonal bipyramid     |       |        |        |        |
| JBTPR-8  | 9 C2v  | Biaugmented trigonal prism J50         |       |       |       |       |        | HPY-8  | 2 C7v | Heptagonal pyramid      |       |        |        |        |
| JETBPY-8 | 8 D3h  | Johnson elongated triangular bipyramid |       |       |       |       |        | OP-8   | 1 D8h | Octagon                 |       |        |        |        |
| JGBF-8   | 7 D2d  | Johnson gyrobifastigium J26            |       |       |       |       |        |        |       |                         |       |        |        |        |

### Detailed *ab initio* calculations of complexes 2-4.

The anisotropy axes of both Dy centres in **2**, **3** and **4** are collinear to each other with tilt angles of 28.80°, 0.002° and 0.045° respectively (Figure S1). For **2**, The eight KDs generated from the  ${}^6\text{H}_{15/2}$  spin-orbit state span 505 and 540  $\text{cm}^{-1}$  for Dy1 and Dy2 centres (Tables S5 and S6). The existence of two different Dy<sup>III</sup> centres is confirmed from this different energy level splitting of the KDs. The ground state of both Dy centres is Ising type with the  $g_z$  value reaching the limit of the  $g_z$  value generated from pure  $|15/2\rangle$  state. The axially of

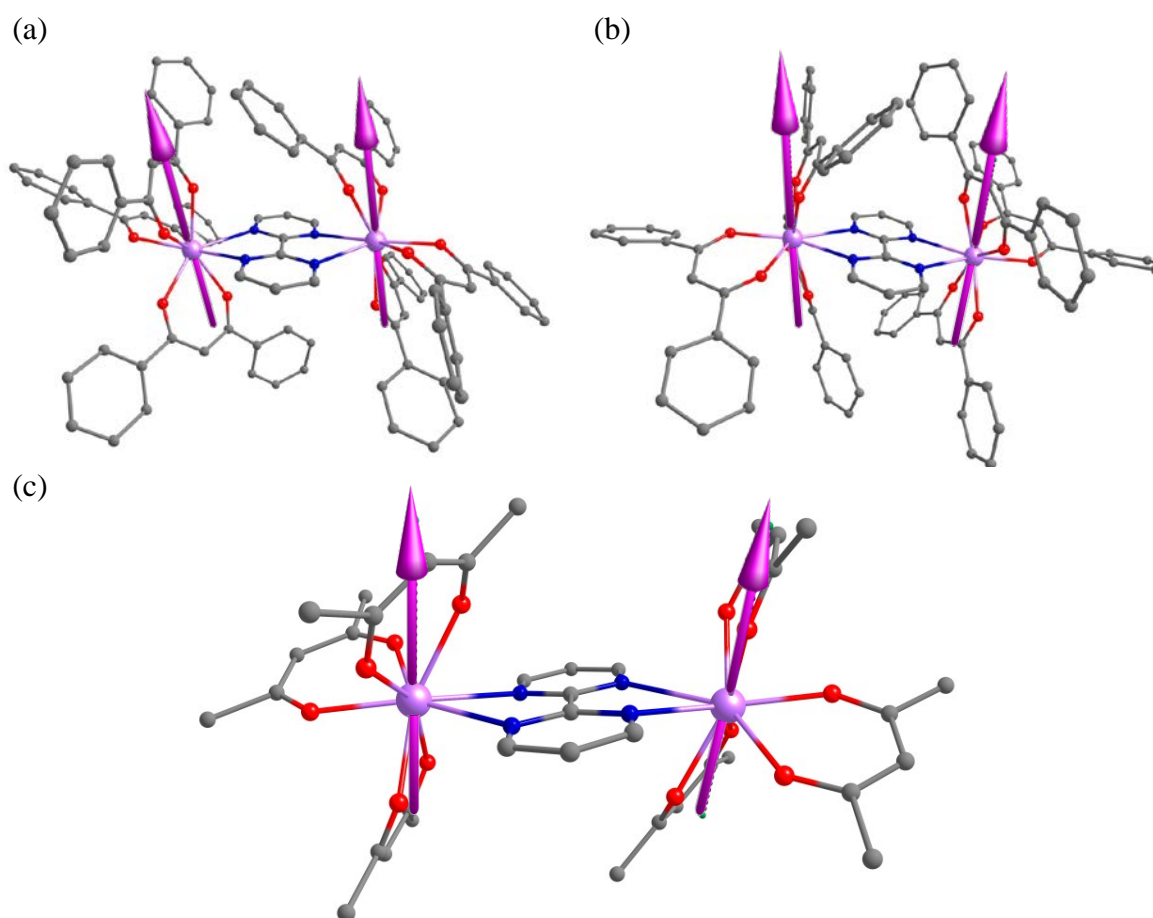

**Figure S1:** The anisotropy axis of both the Dy centres in **2** (a) **3** (b) and **4** (c). The methyl groups has been modelled by hydrogen in the three complexes. Hydrogens are omitted for clarity. Colour code: C-Grey, N-Blue, O-Red, Dy-Violet.

the KDs decreases as up to 5<sup>th</sup> KDs and then it starts to increase up to 8<sup>th</sup> KDs where it reaches its maximum, which is similar to the case of d-1. In the three cases, as observed for d-1, the  $g_{zz}$  axis is found to lie along the  $\beta$ -diketonate ligands at opposite sides of the Dy<sup>III</sup> centre.



The relaxation mechanism of both Dy<sup>III</sup> centres in **2** is depicted in Figure S2. Both Dy<sup>III</sup> centres contain almost pure  $M_J = |\pm 15/2\rangle$  as ground state with negligible QTM. This is further corroborated by negative axial crystal field parameter ( $B_2^0$ ). The matrix element between opposite pair of magnetic moments between ground and 1<sup>st</sup> excited KDs (Raman relaxation) for the Dy1 is very small ( $0.05 \mu_B$ ). This suggests possible Orbach relaxation via 1<sup>st</sup> excited KDs. Although the TA-QTM is considerably large ( $0.28 \mu_B$ ) at the first excited state and favours magnetic relaxation via this state, the matrix element of the next doublet is sufficiently large ( $2.73 \mu_B$ ) to reinforce the relaxation through KD3. This type of relaxation mechanism via higher excited doublets have been suggested earlier.<sup>ii</sup>

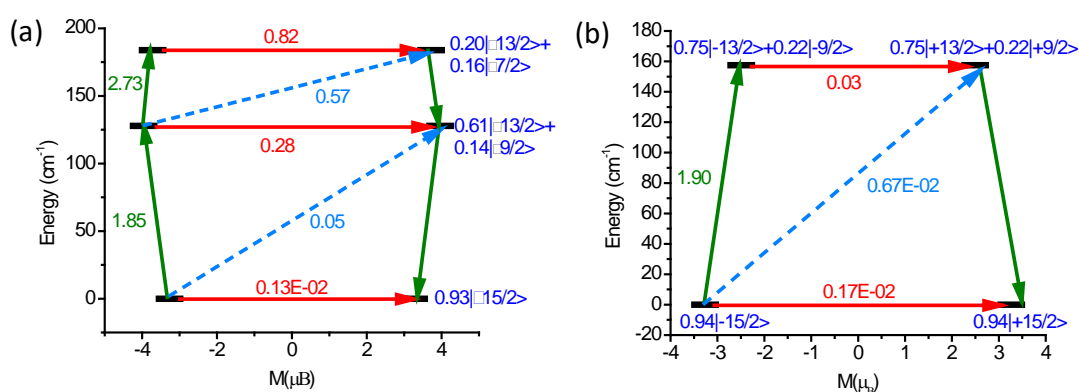

**Figure S2:** Relaxation mechanism of the Dy1 (a) and Dy2 (b) centres in **2**. The Black line indicates the KDs as function of magnetic moments. The red line represents QTM via ground states and TA-QTM via excited states. Dashed line indicates possible Orbach process.

The *ab initio* computed energy barrier  $183.87 \text{ cm}^{-1}$  is in accord with the experimental estimate. This is reflected by the fact that the non-axial crystal field parameter ( $B_2^2$ ,  $B_2^1$ ,  $B_2^{-1}$ ) are significantly larger than the axial crystal field parameter ( $B_2^0$ ). Despite the above mentioned reasons, one must consider that the relaxation time obeys thermally activated relaxation pathways (Orbach process), which dominates only at high temperature, but at low temperature other relaxation process such as direct/Raman may dominate and creates the discrepancy between experimental and computed results. The computed QTM and TA-QTM for the Dy2 centre of complex **2** are considerably small, thus favouring the magnetic relaxation via KD3. However, the matrix element between 2<sup>nd</sup> and 3<sup>rd</sup> KDs with same magnetisation is very small that, forcing it to relax via the 1st excited state (the  $7.25^\circ$  angle between the anisotropy axis of the ground and first excited state is large enough as to force the relaxation to occurs through KD1), leading to an estimated barrier height of  $157.48 \text{ cm}^{-1}$ . The two different barrier heights computed for different Dy(III)

centres is consistent with experimental estimations, although the magnitudes are different. The computed non-axial crystal field parameter becomes larger than the axial crystal field parameters (Table S8), strengthening the probability of QTM in the ground state and decreasing the barrier height estimated by *ab initio* calculations. The Dy2 centre with larger distortion in D<sub>2d</sub> (TDD-8) geometry is expected to have a lower barrier height for magnetisation reversal when compared to the Dy1 centre.

To decipher the role of exchange into magnetic anisotropy, the experimental magnetic susceptibility was fitted by Lines approach using POLY\_ANISO programme (Figure S3). Although the magnetic anisotropy axes of both Dy<sup>III</sup> centres are parallel to each other, the best fit is obtained using the  $J_{\text{tot}} = -0.047 \text{ cm}^{-1}$  ( $J_{\text{exch}} = -0.04 \text{ cm}^{-1}$  and  $J_{\text{dipolar}} = -0.007 \text{ cm}^{-1}$ ). The deviation of the computed magnetic susceptibility with regard to the experimental one originates from the QTM that suppresses the single ion magnetisation blocking barrier of the Dy2 centre. The considerable tunnel splitting  $5.1 \times 10^{-6}$  blocks the magnetisation blockade in the third excited exchange coupled state (see Table S17 for the spectrum of lowest exchange levels). The extracted magnetisation blockade  $127 \text{ cm}^{-1}$  by Lines model resembles the energy of the 2<sup>nd</sup> KDs of the Dy1 centre ( $127 \text{ cm}^{-1}$ ).

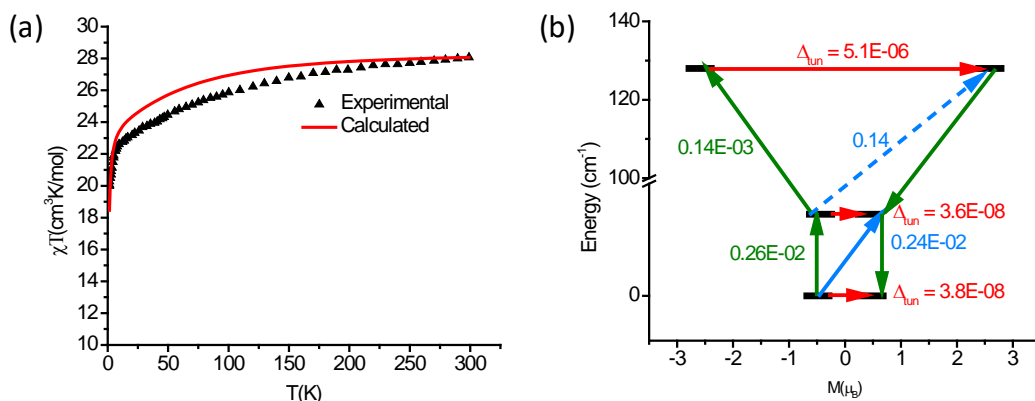

**Figure S3:** (a) Fitted experimental magnetic susceptibility using Lines model. (b) POLY\_ANISO computed blockade barrier of **2**. The black lines indicate exchange states that have been arranged in compliance with the value of its magnetic moment. The red arrows (and pertinent values) correspond to tunnelling transitions within ground-state and first excited-state exchange doublets. However, olive and dashed arrows and their corresponding values represent transition magnetic moment matrix elements of spin-phonon relaxation pathways.

The complex **3** shows different magnetic relaxation compared to complex **2** due to the different lattice solvents ( $\text{CH}_3\text{Cl}$  for **2** and  $\text{CH}_3\text{CN}$  for **3**). Apart from this, the Dy<sup>III</sup> centre in **3** has different distortion parameter from D<sub>2d</sub> and D<sub>4d</sub> symmetry compared to **2**. The anisotropy axes of both centres in **3** are shown in Figure 9. They are tilted by only  $0.02^\circ$ .

The computed g tensors along with energy spectrum and angle of the anisotropy axis of the excited state with ground state is gathered in Table S7-S8. The two Dy<sup>III</sup> centres in this complex has same energy span generated from  $^6\text{H}_{15/2}$  state, thus confirming that the two Dy<sup>III</sup> centres have the same distortion parameter from  $D_{2d}$  and  $D_{4d}$  symmetry. The Ising ground state of the metal centre has  $g_z$  value close to that generated from the  $|15/2\rangle$  state. The negative  $B_2^0$  parameter obtained from crystal field analysis further corroborates the isolation of  $|15/2\rangle$  as ground state (Table S13). The wave function analysis of the 1<sup>st</sup> and 2<sup>nd</sup> KDs is shown along with the relaxation mechanism (Figure S4). The ground state consists of 0.91 $|15/2\rangle$  state with a negligible QTM while the excited state has a major contribution from  $|13/2\rangle$  state. The small TA-QTM ( $0.08\mu_B$ ) in the first excited KDs reinforces relaxation via upper excited states. The matrix element between 2<sup>nd</sup> and 3<sup>rd</sup> KDs is considerably large ( $2.86\mu_B$ ), which favours the Orbach relaxation via 3<sup>rd</sup> KDs. The probability of Raman relaxation between 1<sup>st</sup> and 2<sup>nd</sup> KDs is very small ( $0.01\mu_B$ ), as well as the angle between ground and 1<sup>st</sup> excited KDs is very small (around  $6^\circ$ ), indicating that the relaxation via 1<sup>st</sup> excited state is ruled out.

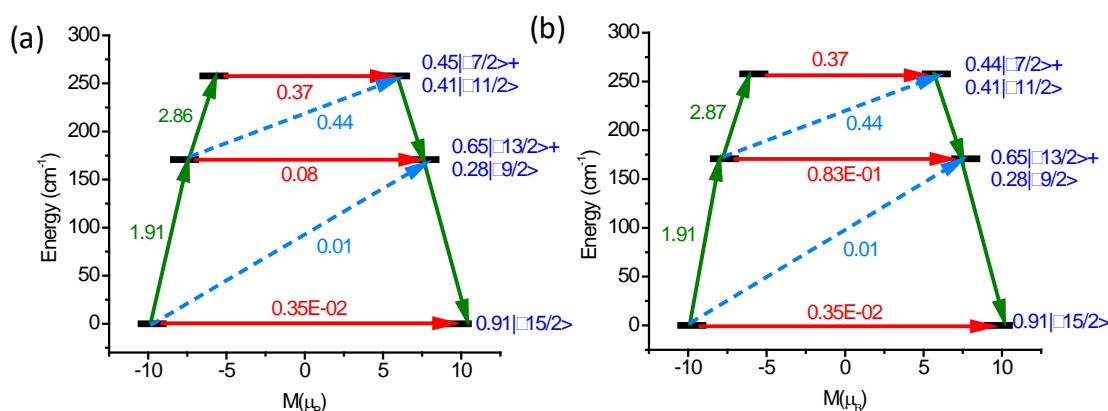

**Figure S4:** (a) Relaxation mechanism of the Dy1 centre in **3**. (b) Relaxation mechanism of the Dy2 centre in **2**. The Black line indicates the KDs as function of magnetic moments. The red line represents QTM via ground states and TA-QTM via excited states. Dashed line indicates possible Orbach process.

The 3<sup>rd</sup> KDs of **3** is composed of  $|11/2\rangle$  and  $|7/2\rangle$  states with contribution of 0.41 and 0.45 respectively. This large mixing between the wave functions generates the large TA-QTM ( $0.37\mu_B$ ) between 3<sup>rd</sup> KDs and reinforces relaxation via this state. The angle of the anisotropy axis between 3<sup>rd</sup> KDs and 1<sup>st</sup> KDs of  $7.21^\circ$  is enough, as in the case of **2**, to favour magnetic relaxation via upper KDs. The effective energy barrier for the magnetisation reversal is the energy gap between KD1 and KD3 ( $257.83\text{ cm}^{-1}$ ). This value

is very close to the barrier height of  $267\text{ cm}^{-1}$  as observed experimentally. Since the QTM and TA-QTM becomes very low (the axial crystal field parameters are larger or comparable to non-axial crystal field parameters) for the  $\text{Dy}^{\text{III}}$  centres, the computed values for both the Dy centres are in line with experimental values.

As in the former case, the experimental magnetic susceptibility was fitted by Lines model using POLY\_ANISO programme (Figure S5). The best fit is obtained using  $J_{\text{tot}} = 0.0059\text{ cm}^{-1}$  ( $J_{\text{exch}} = 0.006\text{ cm}^{-1}$  and  $J_{\text{dipolar}} = -0.00001\text{ cm}^{-1}$ ). The simulated susceptibility matches quite well with the experiment as the experimental barrier height is close to the *ab initio* computed barrier height that removes the possibility of QTM in the ground state. The tunnel splitting in the third exchange coupled excited state is considerably large ( $1.8 \times 10^{-6}$ ) to block the magnetisation via this state. The blocking barrier using Lines model ( $171.79\text{ cm}^{-1}$ ) is far away from the experimental barrier height ( $267\text{ cm}^{-1}$ ) (See Figure S5 and Table S18 for the spectrum of lowest exchange levels). Weaker coupling between the  $\text{Dy}^{\text{III}}$  ions suggest that the magnetic blockade observed arise essentially due to single-ion behaviour and coupled regime is important only extremely low temperatures.

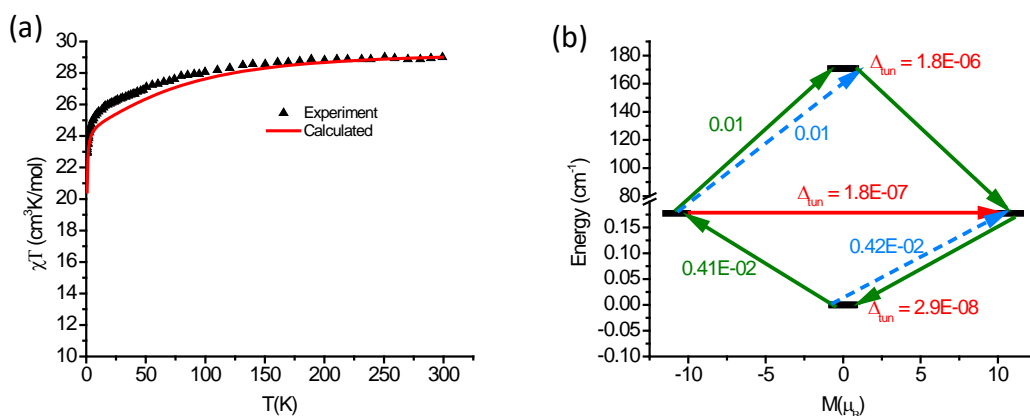

**Figure S5:** (a) Fitted experimental magnetic susceptibility using Lines model of complex **3**. (b) POLY\_ANISO computed blockade barrier of **3**. The black lines indicate exchange states that have been arranged in compliance with the value of its magnetic moment. The red arrows (and pertinent values) correspond to tunnelling transitions within ground-state and first excited-state exchange doublets. However, olive and dashed arrows and their corresponding values represent transition magnetic moment matrix elements of spin-phonon relaxation pathways.

Finally, *ab initio* calculations on complex **4** show that the ground state is strongly anisotropic as depicted earlier. The computed energy spectrum along with the  $g$  tensors is gathered in Table S9-S10. The energy of the eight KDs span up to  $534\text{ cm}^{-1}$  due to

moderate ligand field. The transverse anisotropic component in the ground KDs is negligible as reflected by the negligible QTM in the corresponding relaxation mechanism (Figure S6). The QTM is the lowest among all the molecules studied here. The axuality of the KDs starts to decrease up to 4<sup>th</sup> KDs and then starts to increase again to reach a maximum at 8<sup>th</sup> KDs.

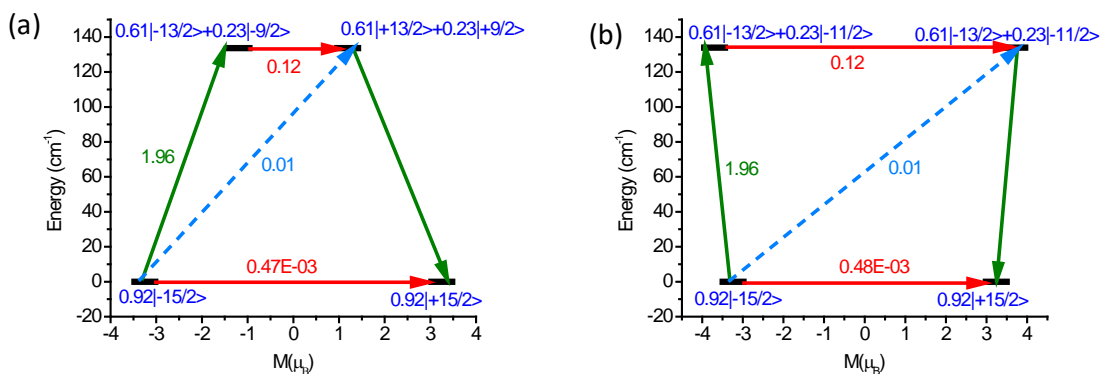

**Figure S6:** (a) Relaxation mechanism of the Dy1 centre in **4**. (b) Relaxation mechanism of the Dy2 centre in **2**. The Black line indicates the KDs as function of magnetic moments. The red line represents QTM via ground states and TA-OTM via excited states. Dashed line indicates possible Orbach process.

The transverse component of anisotropy in the 2<sup>nd</sup> KDs is very large and it is reflected by the TA-QTM of the 1<sup>st</sup> excited state, which is considerably large (0.12 μ<sub>B</sub>) (Figure S6). The ground state KDs is composed of the  $|15/2\rangle$  state and its isolation as ground state further confirmed from the negative  $B_2^0$  parameter in the crystal field analysis (Table S 14). At the 1<sup>st</sup> excited KDs, the large mixing of the wave function ( $0.61 |13/2\rangle + 0.23 |11/2\rangle$ ) generates considerable TA-QTM. The large angle (20.93°) between the anisotropy axis of ground and 1<sup>st</sup> excited KDs reinforces that relaxation takes place through KD2. Since the computed non-axial crystal field parameters become comparable to the axial crystal field parameters, the computed barrier height 133 cm<sup>-1</sup> is overestimated with regard to the experimental barrier height of 97 cm<sup>-1</sup> for magnetisation reversal. Due to the similar distortion parameters, the two Dy<sup>II</sup> I centres follow the same relaxation pathways.

The magnetic exchange has been simulated by Lines approach using the POLY\_ANISO as has been discussed earlier. The best fit is obtained using  $J_{\text{tot}} = 0.008 \text{ cm}^{-1}$  ( $J_{\text{exch}} = 0.008 \text{ cm}^{-1}$  and  $J_{\text{dipolar}} = 0.001 \text{ cm}^{-1}$ ) (Figure S7). These values indicate, as expected, a very weak exchange between the Dy<sup>III</sup> ions through the bipyrimidine bridging ligand. This

ferromagnetic exchange is in line with the anisotropy axis of the two Dy<sup>III</sup> centres, which are parallel to each other with tilt angle of 0.045°.

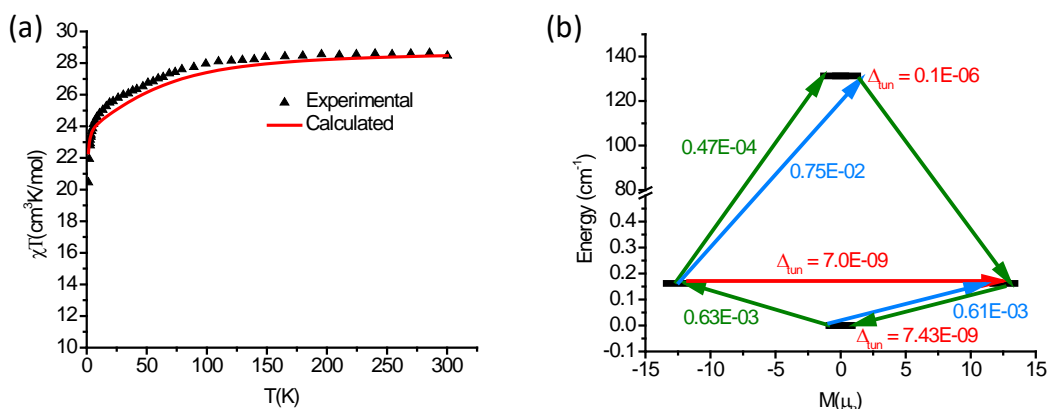

**Figure S7:** (a) Fitted experimental magnetic susceptibility using Lines model of complex **4**. (b) POLY\_ANISO computed blockade barrier of **4**. The black lines indicate exchange states that have been arranged in compliance with the value of its magnetic moment. The red arrows (and pertinent values) correspond to tunnelling transitions within ground-state and first excited-state exchange doublets. However, olive and dashed arrows and their corresponding values represent transition magnetic moment matrix elements of spin-phonon relaxation pathways.

The significant tunnel splitting  $0.1 \times 10^{-6}$  in the third exchange coupled state favours the relaxation via this state (see Table S19 for the spectrum of lowest exchange levels). The simulated energy barrier of 131 cm<sup>-1</sup> is close to that observed of 133 cm<sup>-1</sup> from the single ion analysis, which is due to the weak coupling between two Dy<sup>III</sup> ions.

**Table S5.** Computed energy spectrum along with g-tensors and the angle of the anisotropy axis of excited KDs with the ground KDs of Dy1 centre of complex **2**.

| Energy (cm <sup>-1</sup> ) | g <sub>x</sub> | g <sub>y</sub> | g <sub>z</sub> | Angle of g <sub>zz</sub> between ground and higher excited KDs(°) |
|----------------------------|----------------|----------------|----------------|-------------------------------------------------------------------|
| 0.00                       | 0.001          | 0.007          | 19.609         | --                                                                |
| 127.88                     | 0.544          | 0.832          | 16.113         | 26.93                                                             |
| 183.87                     | 1.519          | 2.701          | 14.006         | 51.61                                                             |
| 232.50                     | 1.008          | 3.826          | 11.895         | 44.82                                                             |
| 282.28                     | 4.221          | 4.852          | 11.887         | 84.40                                                             |
| 383.24                     | 0.404          | 1.454          | 15.923         | 63.12                                                             |
| 428.74                     | 0.533          | 2.109          | 16.187         | 74.67                                                             |
| 505.14                     | 0.102          | 0.208          | 19.266         | 58.03                                                             |

**Table S6.** Computed energy spectrum along with g tensors and the angle of the anisotropy axis of excited KDs with the ground KDs of Dy2 centre of complex **2**.

| Energy (cm <sup>-1</sup> ) | g <sub>x</sub> | g <sub>y</sub> | g <sub>z</sub> | Angle of g <sub>zz</sub> between ground and higher excited KDs(°) |
|----------------------------|----------------|----------------|----------------|-------------------------------------------------------------------|
| 0.00                       | 0.004          | 0.006          | 19.588         | --                                                                |
| 157.48                     | 0.056          | 0.096          | 15.993         | 7.25                                                              |
| 229.08                     | 0.773          | 0.987          | 13.555         | 32.55                                                             |
| 275.97                     | 1.756          | 3.481          | 9.732          | 36.36                                                             |
| 307.83                     | 3.356          | 5.683          | 12.273         | 79.76                                                             |
| 388.83                     | 0.193          | 0.275          | 19.328         | 65.62                                                             |
| 428.51                     | 0.037          | 0.065          | 17.762         | 78.15                                                             |
| 540.73                     | 0.018          | 0.044          | 19.281         | 55.14                                                             |

**Table S7.** Computed energy spectrum along with g tensors and the angle of the anisotropy axis of excited KDs with the ground KDs of Dy1 centre of complex **3**.

| Energy (cm <sup>-1</sup> ) | g <sub>x</sub> | g <sub>y</sub> | g <sub>z</sub> | Angle of g <sub>zz</sub> between ground and higher excited KDs(°) |
|----------------------------|----------------|----------------|----------------|-------------------------------------------------------------------|
| 0.00                       | 0.008          | 0.013          | 19.483         | --                                                                |
| 170.80                     | 0.152          | 0.302          | 15.437         | 6.02                                                              |
| 257.83                     | 0.924          | 1.155          | 11.695         | 7.28                                                              |
| 310.55                     | 1.274          | 2.878          | 8.818          | 36.46                                                             |
| 331.43                     | 11.328         | 7.196          | 2.893          | 8.26                                                              |
| 440.83                     | 0.080          | 0.143          | 19.512         | 58.72                                                             |
| 496.04                     | 0.017          | 0.098          | 17.541         | 95.02                                                             |
| 549.49                     | 0.039          | 0.112          | 18.503         | 121.43                                                            |

**Table S8.** Computed energy spectrum along with g tensors and the angle of the anisotropy axis of excited KDs with the ground KDs of Dy2 centre of complex **3**.

| Energy (cm <sup>-1</sup> ) | g <sub>x</sub> | g <sub>y</sub> | g <sub>z</sub> | Angle of g <sub>zz</sub> between ground and higher excited KDs(°) |
|----------------------------|----------------|----------------|----------------|-------------------------------------------------------------------|
| 0.00                       | 0.008          | 0.013          | 19.525         | --                                                                |
| 170.80                     | 0.152          | 0.302          | 15.471         | 6.12                                                              |
| 257.83                     | 0.924          | 1.151          | 11.712         | 7.21                                                              |
| 310.55                     | 1.275          | 2.883          | 8.826          | 36.33                                                             |
| 331.43                     | 11.327         | 7.210          | 2.895          | 8.14                                                              |
| 440.83                     | 0.080          | 0.142          | 19.494         | 58.76                                                             |
| 496.05                     | 0.018          | 0.098          | 17.555         | 95.16                                                             |
| 549.49                     | 0.039          | 0.112          | 18.524         | 121.62                                                            |

**Table S9.** Computed energy spectrum along with g tensors and the angle of the anisotropy axis of excited KDs with the ground KDs of Dy1 centre of complex **4**.

| Energy (cm <sup>-1</sup> ) | g <sub>x</sub> | g <sub>y</sub> | g <sub>z</sub> | Angle of g <sub>zz</sub> between ground and higher excited KDs(°) |
|----------------------------|----------------|----------------|----------------|-------------------------------------------------------------------|
| 0.00                       | 0.000          | 0.002          | 19.493         | --                                                                |
| 133.70                     | 0.274          | 0.331          | 15.658         | 20.96                                                             |
| 187.29                     | 1.337          | 1.627          | 13.938         | 151.26                                                            |
| 222.66                     | 3.120          | 4.749          | 9.300          | 148.33                                                            |
| 272.72                     | 2.848          | 2.639          | 9.741          | 61.30                                                             |
| 317.91                     | 0.852          | 1.632          | 16.983         | 109.99                                                            |
| 446.03                     | 0.027          | 0.027          | 17.630         | 80.50                                                             |
| 534.30                     | 0.007          | 0.019          | 18.973         | 55.60                                                             |

**Table S10.** Computed energy spectrum along with g tensors and the angle of the anisotropy axis of excited KDs with the ground KDs of Dy2 centre of complex **4**.

| Energy (cm <sup>-1</sup> ) | g <sub>x</sub> | g <sub>y</sub> | g <sub>z</sub> | Angle of g <sub>zz</sub> between ground and higher excited KDs(°) |
|----------------------------|----------------|----------------|----------------|-------------------------------------------------------------------|
| 0.00                       | 0.001          | 0.002          | 19.446         | --                                                                |
| 133.93                     | 0.277          | 0.331          | 15.616         | 20.97                                                             |
| 187.85                     | 1.304          | 1.590          | 13.862         | 28.30                                                             |
| 223.10                     | 3.181          | 4.796          | 9.319          | 147.69                                                            |
| 273.30                     | 2.720          | 2.601          | 9.726          | 61.47                                                             |
| 317.66                     | 0.881          | 1.716          | 16.912         | 110.16                                                            |
| 446.51                     | 0.026          | 0.027          | 17.597         | 80.51                                                             |
| 534.60                     | 0.007          | 0.020          | 18.942         | 55.78                                                             |

**Table S11.** SINGLE\_ANISO computed crystal field parameters for the Dy1 and Dy2 centres in complex **d-1**. The crystal field Hamiltonian:

$$\hat{H}_{CF} = \sum_{k=-q}^q \sum_{k=q} B_k^q \tilde{O}_k^q$$

Where  $\tilde{O}_k^q$  and  $B_k^q$  are the computed extended Stevens operator and crystal field (CF) parameter, respectively. Quantization axis is considered as the main magnetic axis of the KD1

| k | q  | $B_k^q$ (Dy1)    | $B_k^q$ (Dy2)    |
|---|----|------------------|------------------|
| 2 | -2 | -6.89E-01        | 2.84E-02         |
|   | -1 | -3.02E+00        | 1.89E-01         |
|   | 0  | <b>-1.66E+00</b> | <b>-1.46E+00</b> |
|   | 1  | 2.17E+00         | 3.62E+00         |
|   | 2  | -2.54E-01        | <b>1.70E+00</b>  |
| 4 | -4 | -2.03E-02        | 1.35E-02         |
|   | -3 | -3.70E-02        | 3.12E-02         |
|   | -2 | -2.11E-02        | 7.81E-03         |
|   | -1 | 2.39E-02         | 1.20E-02         |



|   |    |                  |                  |
|---|----|------------------|------------------|
|   | 0  | <b>-5.31E-03</b> | <b>-5.26E-03</b> |
|   | 1  | 3.04E-03         | -1.33E-02        |
|   | 2  | 7.88E-03         | 2.31E-02         |
|   | 3  | -5.78E-03        | 4.50E-03         |
|   | 4  | 2.05E-03         | <b>-1.34E-02</b> |
| 6 | -6 | 1.04E-04         | 1.22E-04         |
|   | -5 | -4.40E-04        | 5.42E-04         |
|   | -4 | -1.01E-04        | 1.23E-04         |
|   | -3 | -3.57E-04        | 2.40E-04         |
|   | -2 | 1.02E-04         | -6.99E-05        |
|   | -1 | -1.50E-04        | -1.73E-04        |
|   | 0  | <b>7.05E-06</b>  | <b>1.96E-06</b>  |
|   | 1  | -1.91E-04        | -3.85E-05        |
|   | 2  | -7.41E-05        | -6.74E-05        |
|   | 3  | -1.41E-04        | 2.47E-04         |
|   | 4  | -9.58E-05        | 7.10E-05         |
|   | 5  | -1.93E-04        | -5.88E-04        |
|   | 6  | -6.94E-05        | <b>3.07E-05</b>  |

**Table S12.** SINGLE\_ANISO computed crystal field parameters for the Dy1 and Dy2 centres in complex **2**. The crystal field Hamiltonian:

$$\hat{H}_{CF} = \sum_k \sum_{q=-k}^k B_k^q \tilde{O}_k^q$$

Where  $\tilde{O}_k^q$  and  $B_k^q$  are the computed extended Stevens operator and crystal field (CF) parameter, respectively. Quantization axis is considered as the main magnetic axis of the KD1

| k | q  | $B_k^q$ (Dy1)    | $B_k^q$ (Dy2)    |
|---|----|------------------|------------------|
| 2 | -2 | 8.98E-01         | -1.34E+00        |
|   | -1 | 2.46E+00         | -7.65E-01        |
|   | 0  | <b>-1.65E+00</b> | <b>-1.78E+00</b> |
|   | 1  | 2.10E+00         | 2.70E+00         |
|   | 2  | 1.14E+00         | <b>7.66E-01</b>  |
| 4 | -4 | -9.57E-03        | 9.29E-03         |
|   | -3 | 2.70E-02         | -2.63E-02        |
|   | -2 | -1.09E-02        | -3.03E-02        |
|   | -1 | -2.14E-02        | -9.59E-03        |
|   | 0  | <b>-4.60E-03</b> | <b>-4.56E-03</b> |
|   | 1  | 4.83E-03         | -9.29E-03        |
|   | 2  | 2.03E-02         | 1.98E-03         |
| 6 | 3  | 7.37E-02         | 5.51E-03         |
|   | 4  | 4.85E-04         | <b>-5.87E-03</b> |
|   | -6 | 5.57E-06         | 1.10E-04         |
|   | -5 | -3.93E-04        | 3.52E-04         |
|   | -4 | 2.73E-05         | -1.09E-04        |
|   | -3 | -1.61E-04        | -1.71E-04        |
|   | -2 | 1.43E-04         | 6.41E-05         |
|   | -1 | 3.32E-05         | 1.37E-04         |
|   | 0  | <b>1.71E-06</b>  | <b>-8.45E-06</b> |
|   | 1  | -9.68E-05        | -2.00E-05        |
|   | 2  | 3.01E-05         | 9.38E-05         |
|   | 3  | 2.18E-04         | -2.64E-04        |
|   | 4  | 1.22E-04         | -1.45E-04        |
|   | 5  | 3.45E-04         | -4.01E-06        |
|   | 6  | 2.30E-04         | <b>-1.76E-05</b> |

**Table S13.** SINGLE\_ANISO computed crystal field parameters for the Dy1 and Dy2 centres in complex **3**. The crystal field Hamiltonian:

$$\hat{H}_{CF} = \sum_k \sum_{q=-k}^k B_k^q \tilde{O}_k^q$$

Where  $\tilde{O}_k^q$  and  $B_k^q$  are the computed extended Stevens operator and crystal field (CF) parameter, respectively. Quantization axis is considered as the main magnetic axis of the KD1

| k | q  | $B_k^q$ (Dy1)    | $B_k^q$ (Dy2)    |
|---|----|------------------|------------------|
| 2 | -2 | 3.61E-01         | 3.70E-01         |
|   | -1 | 3.49E-01         | 3.62E-01         |
|   | 0  | <b>-1.92E+00</b> | <b>-1.92E+00</b> |
|   | 1  | 1.11E+00         | 1.15E+00         |
|   | 2  | <b>1.75E+00</b>  | <b>1.75E+00</b>  |
| 4 | -4 | 1.05E-03         | 7.63E-04         |
|   | -3 | 3.40E-02         | 3.34E-02         |
|   | -2 | 2.90E-02         | 2.92E-02         |
|   | -1 | 5.53E-03         | 5.83E-03         |
|   | 0  | <b>-4.46E-03</b> | <b>-4.47E-03</b> |
|   | 1  | 7.69E-05         | 5.42E-04         |
|   | 2  | 2.32E-02         | 2.30E-02         |
|   | 3  | 1.27E-02         | 1.18E-02         |
|   | 4  | <b>-1.66E-02</b> | <b>-1.67E-02</b> |
| 6 | -6 | 8.32E-05         | 8.15E-05         |
|   | -5 | 2.80E-04         | 2.78E-04         |
|   | -4 | 1.97E-04         | 1.96E-04         |
|   | -3 | 1.06E-04         | 1.11E-04         |
|   | -2 | -1.64E-04        | -1.62E-04        |
|   | -1 | -5.15E-05        | -5.36E-05        |
|   | 0  | <b>-1.80E-05</b> | <b>-1.81E-05</b> |
|   | 1  | -7.75E-05        | -7.44E-05        |
|   | 2  | 8.55E-05         | 8.51E-05         |
|   | 3  | -1.26E-04        | -1.29E-04        |
|   | 4  | -5.31E-06        | -8.38E-06        |
|   | 5  | 2.39E-04         | 2.34E-04         |
|   | 6  | <b>-1.09E-04</b> | <b>-1.10E-04</b> |

**Table S14.** SINGLE\_ANISO computed crystal field parameters for the Dy1 and Dy2 centres in complex **4**. The crystal field Hamiltonian:

$$\hat{H}_{CF} = \sum_k \sum_{q=-k}^k B_k^q \tilde{O}_k^q$$

Where  $\tilde{O}_k^q$  and  $B_k^q$  are the computed extended Stevens operator and crystal field (CF) parameter, respectively. Quantization axis is considered as the main magnetic axis of the KD1

| k | q  | $B_k^q$ (Dy1)    | $B_k^q$ (Dy2)    |
|---|----|------------------|------------------|
| 2 | -2 | 4.76E-01         | 6.10E-01         |
|   | -1 | -3.50E+00        | 3.40E+00         |
|   | 0  | <b>-1.65E+00</b> | <b>-1.65E+00</b> |
|   | 1  | -1.23E+00        | 1.42E+00         |
|   | 2  | -1.11E+00        | <b>-1.06E+00</b> |
| 4 | -4 | 1.18E-02         | 1.34E-02         |
|   | -3 | -1.66E-02        | 2.74E-02         |

|   |    |                  |                  |
|---|----|------------------|------------------|
| 6 | -2 | 3.20E-02         | 3.18E-02         |
|   | -1 | 1.05E-02         | -1.13E-02        |
|   | 0  | <b>-3.17E-03</b> | <b>-3.18E-03</b> |
|   | 1  | -1.32E-02        | 1.24E-02         |
|   | 2  | -1.24E-03        | 2.51E-03         |
|   | 3  | 6.11E-02         | -5.74E-02        |
|   | 4  | -8.29E-03        | <b>-5.51E-03</b> |
|   | -6 | -2.88E-05        | -4.55E-05        |
|   | -5 | 7.18E-05         | -9.87E-05        |
|   | -4 | -8.05E-05        | -4.22E-05        |
|   | -3 | -2.92E-04        | 2.99E-04         |
|   | -2 | -1.00E-04        | -8.62E-05        |
|   | -1 | 8.35E-05         | -7.12E-05        |
|   | 0  | <b>-1.79E-05</b> | <b>-1.76E-05</b> |
|   | 1  | 1.79E-04         | -1.82E-04        |
|   | 2  | -1.21E-04        | -1.34E-04        |
|   | 3  | 8.15E-05         | -3.20E-05        |
|   | 4  | -1.58E-04        | -1.73E-04        |
|   | 5  | -9.12E-05        | 6.76E-05         |
|   | 6  | 5.66E-05         | <b>4.31E-05</b>  |

**Table S15.** Exchange values of complexes d-**1** to **4** using DFT approach.

| Complex     | $J$ (cm <sup>-1</sup> ) |
|-------------|-------------------------|
| d- <b>1</b> | -0.0008                 |
| <b>2</b>    | -0.0008                 |
| <b>3</b>    | -0.0008                 |
| <b>4</b>    | -0.0011                 |

**Table S16.** Energies (cm<sup>-1</sup>), corresponding tunnel splitting ( $\Delta_{\text{tun}}$ ) and g values (main magnetic g factors) of the low-lying exchange doublets state in complex d-**1**. We have only summarised the exchange doublets through which eventual magnetization relaxation takes place:

| Ising doublets | Energy (cm <sup>-1</sup> ) | g values             |                      |          | $\Delta_{\text{tun}}$ (cm <sup>-1</sup> ) |
|----------------|----------------------------|----------------------|----------------------|----------|-------------------------------------------|
|                |                            | $g_{xx}$             | $g_{yy}$             | $g_{zz}$ |                                           |
| 1              | 0.0000<br>0.0000           | 3.2*10 <sup>-8</sup> | 1.2*10 <sup>-8</sup> | 1.5517   | 2.4*10 <sup>-7</sup>                      |
| 2              | 0.2073<br>0.2073           | 3.2*10 <sup>-8</sup> | 4.7*10 <sup>-8</sup> | 39.3413  | 9.3*10 <sup>-7</sup>                      |
| 3              | 129.9713<br>129.9713       | 3.2*10 <sup>-8</sup> | 4.4*10 <sup>-8</sup> | 4.4843   | 0.6*10 <sup>-5</sup>                      |

**Table S17.** Energies (cm<sup>-1</sup>), corresponding tunnel splitting ( $\Delta_{\text{tun}}$ ) and g values (main magnetic g factors) of the low-lying exchange doublets state in complex **2**. We have only

summarised the exchange doublets through which eventual magnetization relaxation takes place:

| Ising doublets | Energy (cm <sup>-1</sup> ) | g values            |                     |          | $\Delta_{\text{tun}}$ (cm <sup>-1</sup> ) |
|----------------|----------------------------|---------------------|---------------------|----------|-------------------------------------------|
|                |                            | $g_{xx}$            | $g_{yy}$            | $g_{zz}$ |                                           |
| 1              | 0.0000<br>0.0000           | $3.2 \cdot 10^{-8}$ | 0.0                 | 0.9698   | $3.8 \cdot 10^{-8}$                       |
| 2              | 0.3636<br>0.3636           | $3.2 \cdot 10^{-8}$ | $0.8 \cdot 10^{-8}$ | 39.1838  | $3.6 \cdot 10^{-8}$                       |
| 3              | 128.0021<br>128.0021       | $1.7 \cdot 10^{-8}$ | $1.0 \cdot 10^{-7}$ | 9.3951   | $5.1 \cdot 10^{-6}$                       |

**Table S18.** Energies (cm<sup>-1</sup>), corresponding tunnel splitting ( $\Delta_{\text{tun}}$ ) and g values (main magnetic g factors) of the low-lying exchange doublets state in complex **3**. We have only summarised the exchange doublets through which eventual magnetization relaxation takes place:

| Ising doublets | Energy (cm <sup>-1</sup> ) | g values            |                     |          | $\Delta_{\text{tun}}$ (cm <sup>-1</sup> ) |
|----------------|----------------------------|---------------------|---------------------|----------|-------------------------------------------|
|                |                            | $g_{xx}$            | $g_{yy}$            | $g_{zz}$ |                                           |
| 1              | 0.0000<br>0.0000           | 0.0                 | $0.6 \cdot 10^{-8}$ | 0.0756   | $2.9 \cdot 10^{-8}$                       |
| 2              | 0.1772<br>0.1772           | $3.4 \cdot 10^{-7}$ | $6.7 \cdot 10^{-7}$ | 39.0082  | $1.8 \cdot 10^{-7}$                       |
| 3              | 170.7947<br>170.4947       | $0.2 \cdot 10^{-8}$ | $0.4 \cdot 10^{-8}$ | 0.3125   | $1.8 \cdot 10^{-6}$                       |

**Table S19.** Energies (cm<sup>-1</sup>), corresponding tunnel splitting ( $\Delta_{\text{tun}}$ ) and g values (main magnetic g factors) of the low-lying exchange doublets state in complex **4**. We have only summarised the exchange doublets through which eventual magnetization relaxation takes place:

| Ising doublets | Energy (cm <sup>-1</sup> ) | g values            |                     |          | $\Delta_{\text{tun}}$ (cm <sup>-1</sup> ) |
|----------------|----------------------------|---------------------|---------------------|----------|-------------------------------------------|
|                |                            | $g_{xx}$            | $g_{yy}$            | $g_{zz}$ |                                           |
| 1              | 0.0000<br>0.0000           | $0.1 \cdot 10^{-8}$ | $0.2 \cdot 10^{-8}$ | 0.0891   | $7.4 \cdot 10^{-9}$                       |
| 2              | 0.1617<br>0.1617           | $3.2 \cdot 10^{-8}$ | $6.1 \cdot 10^{-8}$ | 38.8336  | $7.0 \cdot 10^{-9}$                       |
| 3              | 131.2893<br>131.2893       | $3.2 \cdot 10^{-8}$ | $0.4 \cdot 10^{-8}$ | 7.4691   | $0.1 \cdot 10^{-6}$                       |

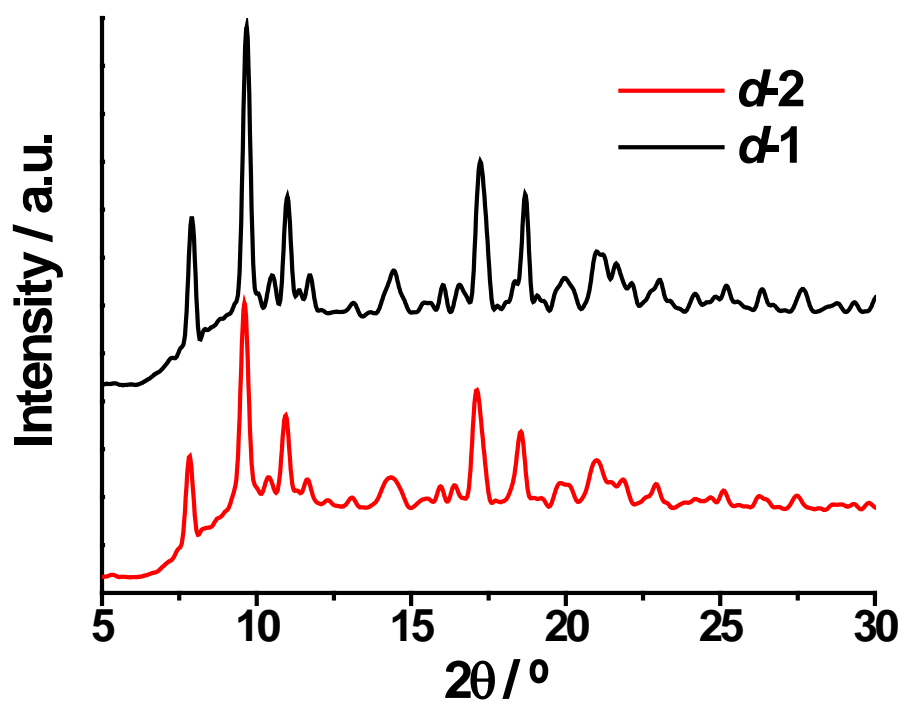

**Figure S8.** Experimental XRPD diagrams for complexes **d-1** (black) and **d-2** (red).

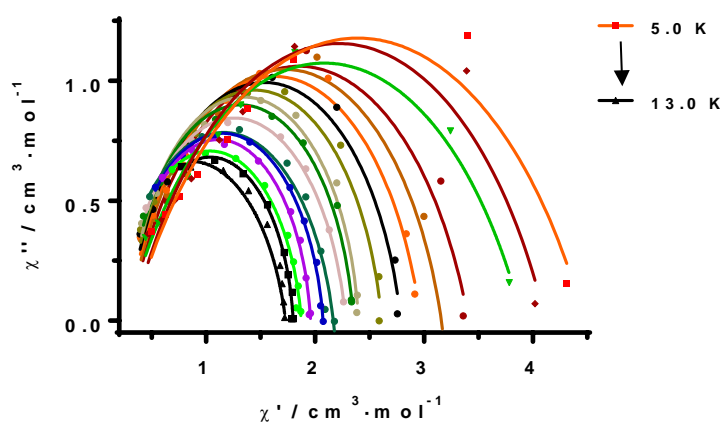

**Figure S9.** Cole-Cole plot for **d-1** at zero field.

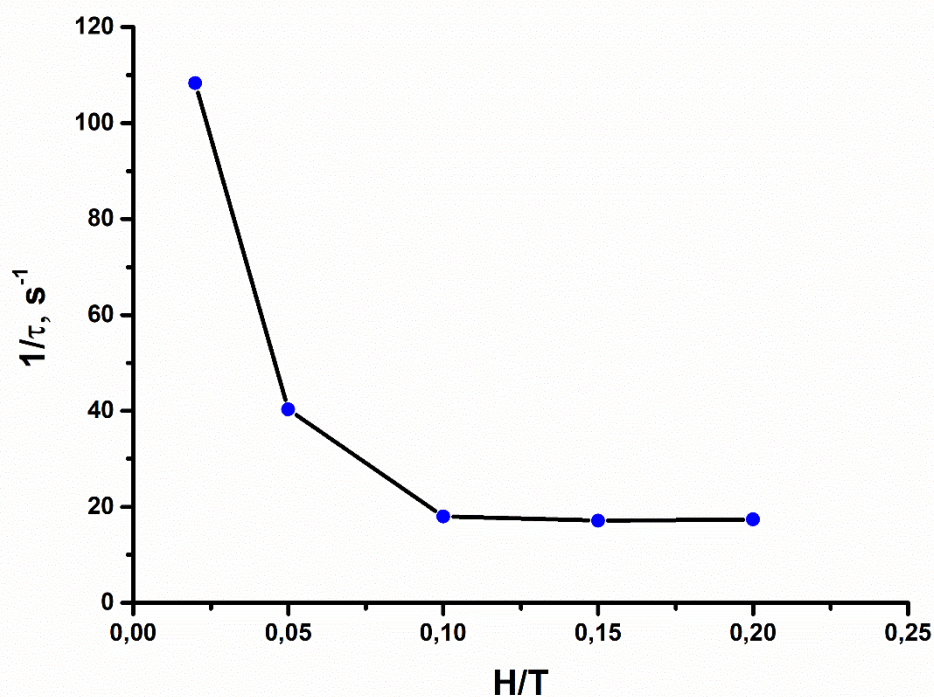

**Figure S10.**Field dependence of the relaxation time for **d-1** at 5 K.

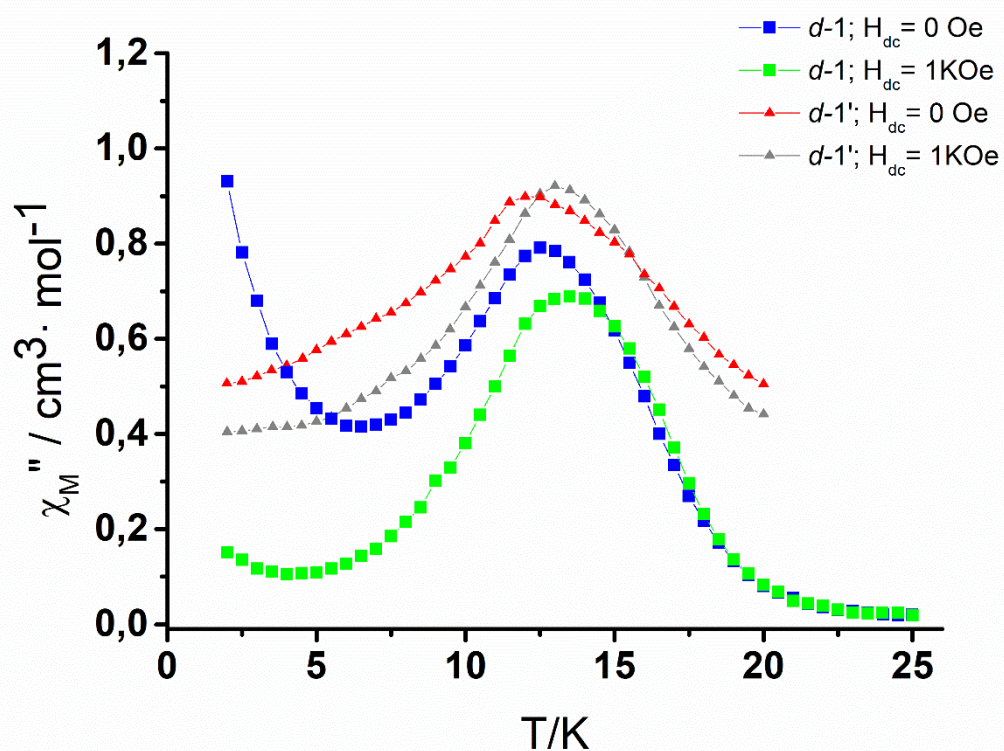

**Figure S11.**Thermal dependence of the out-phase susceptibilities under zero and 0.1 T field for complex **d-1** and the diluted complex **d-1'** at 1400 Hz.

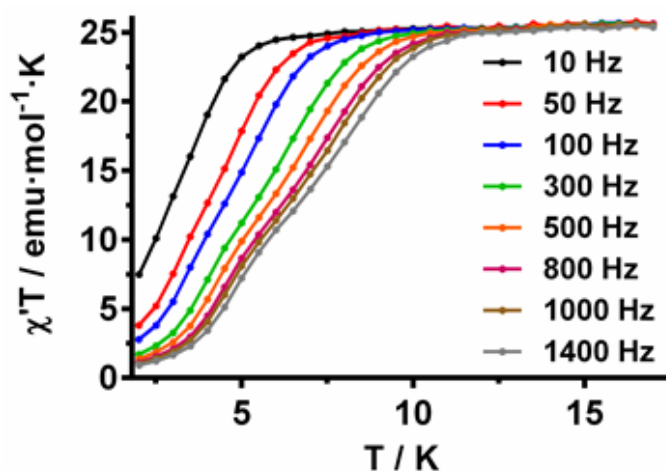

**Figure S12.** Thermal dependence of the  $\chi'_M T$  product for complex **1** under an optimized dc field of 0.1 T.

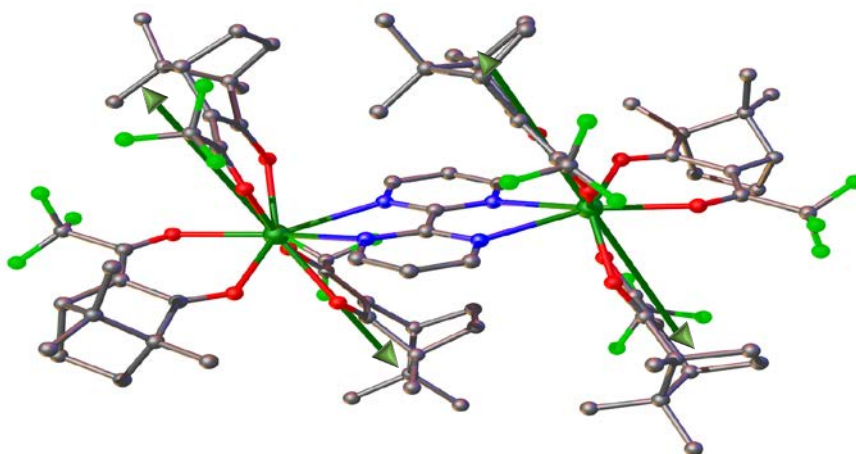

**Figure S13.** Quantitative calculation of the anisotropic axes orientation (green arrows) using the Chilton's method.<sup>ii</sup>

<sup>i</sup> a) S. Alvarez, P. Alemany, D. Casanova, J. Cirera, M. Llunell, D. Avnir, *Coord. Chem. Rev.* **2005**, 249, 1693-1708, b) J. Cirera, E. Ruiz, S. Alvarez, *Organometallics*, **2005**, 24, 1556-1562.

<sup>ii</sup> Singh, S. K., Gupta, T., Shanmugam, M., Rajaraman, G. (2014). Unprecedented magnetic relaxation via the fourth excited state in low-coordinate lanthanide single-ion magnets: a theoretical perspective. *Chem. Commun.* 50, 15513-15516.

<sup>iii</sup> N. F. Chilton, R. P. Anderson, L. D. Turner, A. Soncini and K. S. Murray, *J. Comput. Chem.*, 2013, 34, 1164-1175.
